# Supplementary material for: Mass drug administration for the acceleration of malaria elimination in a region of Myanmar with artemisinin-resistant falciparum malaria: a cluster-randomised trial
Source: PubMed Central journal article supplement (PMC7614510; doi:10.1016/s1473-3099(20)30997-x), 2021-06-18
Supplement: EMS171004-supplement-Supplementary_Materials.pdf [file EMS171004-supplement-Supplementary_Materials.pdf]

## Supplementary Materials

**Supplementary table 1.** Results from baseline uPCR survey in 43 villages screened.

| <b>Samples</b> | <b><i>P. falciparum</i></b> | <b><i>P. vivax</i></b> | <b><i>P. ovale</i></b> | <b><i>P. malariae</i></b> | <b>Plasmodium spp.</b> |
|----------------|-----------------------------|------------------------|------------------------|---------------------------|------------------------|
| 67             | 10 (15)                     | 16 (24)                | 0 (0)                  | 0 (0)                     | 2 (3)                  |
| 56             | 11 (20)                     | 9 (16)                 | 0 (0)                  | 2 (4)                     | 0 (0)                  |
| 44             | 1 (2)                       | 3 (7)                  | 0 (0)                  | 0 (0)                     | 0 (0)                  |
| 72             | 12 (17)                     | 9 (13)                 | 1 (1)                  | 1 (1)                     | 8 (11)                 |
| 76             | 8 (11)                      | 5 (7)                  | 0 (0)                  | 1 (1)                     | 1 (1)                  |
| 33             | 10 (30)                     | 7 (21)                 | 0 (0)                  | 4 (12)                    | 2 (6)                  |
| 59             | 16 (27)                     | 22 (37)                | 0 (0)                  | 10 (17)                   | 4 (7)                  |
| 39             | 1 (3)                       | 5 (13)                 | 1 (3)                  | 0 (0)                     | 2 (5)                  |
| 66             | 13 (20)                     | 25 (38)                | 0 (0)                  | 4 (6)                     | 5 (8)                  |
| 59             | 11 (19)                     | 23 (39)                | 0 (0)                  | 8 (14)                    | 1 (2)                  |
| 65             | 8 (12)                      | 19 (29)                | 0 (0)                  | 0 (0)                     | 2 (3)                  |
| 69             | 1 (1)                       | 1 (1)                  | 0 (0)                  | 0 (0)                     | 1 (1)                  |
| 68             | 0 (0)                       | 5 (7)                  | 0 (0)                  | 0 (0)                     | 0 (0)                  |
| 76             | 11 (14)                     | 22 (29)                | 0 (0)                  | 7 (9)                     | 2 (3)                  |
| 78             | 6 (8)                       | 15 (19)                | 0 (0)                  | 3 (4)                     | 4 (5)                  |
| 54             | 5 (9)                       | 16 (30)                | 0 (0)                  | 1 (2)                     | 2 (4)                  |
| 67             | 1 (1)                       | 10 (15)                | 0 (0)                  | 0 (0)                     | 1 (1)                  |
| 64             | 3 (5)                       | 10 (16)                | 0 (0)                  | 0 (0)                     | 0 (0)                  |
| 68             | 3 (4)                       | 17 (25)                | 0 (0)                  | 2 (3)                     | 0 (0)                  |
| 49             | 9 (18)                      | 14 (29)                | 0 (0)                  | 2 (4)                     | 2 (4)                  |
| 64             | 1 (2)                       | 12 (19)                | 0 (0)                  | 0 (0)                     | 0 (0)                  |
| 55             | 7 (13)                      | 19 (35)                | 0 (0)                  | 0 (0)                     | 0 (0)                  |
| 37             | 10 (27)                     | 6 (16)                 | 1 (3)                  | 0 (0)                     | 1 (3)                  |
| 55             | 0 (0)                       | 15 (27)                | 0 (0)                  | 0 (0)                     | 2 (4)                  |
| 47             | 2 (4)                       | 19 (40)                | 0 (0)                  | 1 (2)                     | 0 (0)                  |
| 63             | 22 (35)                     | 24 (38)                | 0 (0)                  | 7 (11)                    | 0 (0)                  |
| 65             | 0 (0)                       | 7 (11)                 | 0 (0)                  | 0 (0)                     | 0 (0)                  |
| 84             | 0 (0)                       | 9 (11)                 | 0 (0)                  | 0 (0)                     | 3 (4)                  |
| 62             | 26 (42)                     | 6 (10)                 | 0 (0)                  | 4 (6)                     | 11 (18)                |
| 76             | 2 (3)                       | 10 (13)                | 0 (0)                  | 1 (1)                     | 1 (1)                  |
| 56             | 0 (0)                       | 9 (16)                 | 0 (0)                  | 0 (0)                     | 2 (4)                  |
| 60             | 5 (8)                       | 11 (18)                | 0 (0)                  | 2 (3)                     | 0 (0)                  |
| 59             | 0 (0)                       | 1 (2)                  | 0 (0)                  | 0 (0)                     | 0 (0)                  |
| 75             | 0 (0)                       | 4 (5)                  | 0 (0)                  | 0 (0)                     | 0 (0)                  |
| 77             | 1 (1)                       | 12 (16)                | 0 (0)                  | 2 (3)                     | 5 (6)                  |
| 64             | 0 (0)                       | 6 (9)                  | 0 (0)                  | 1 (2)                     | 0 (0)                  |
| 67             | 3 (4)                       | 21 (31)                | 0 (0)                  | 7 (10)                    | 3 (4)                  |
| 75             | 1 (1)                       | 5 (7)                  | 0 (0)                  | 0 (0)                     | 5 (7)                  |
| 55             | 4 (7)                       | 14 (25)                | 0 (0)                  | 3 (5)                     | 0 (0)                  |
| 66             | 1 (2)                       | 9 (14)                 | 0 (0)                  | 0 (0)                     | 2 (3)                  |
| 57             | 5 (9)                       | 13 (23)                | 0 (0)                  | 1 (2)                     | 0 (0)                  |
| 68             | 2 (3)                       | 13 (19)                | 0 (0)                  | 0 (0)                     | 2 (3)                  |
| 58             | 2 (3)                       | 5 (9)                  | 0 (0)                  | 0 (0)                     | 0 (0)                  |
| <b>2674</b>    | <b>234 (9)</b>              | <b>503 (19)</b>        | <b>3 (0)</b>           | <b>74 (3)</b>             | <b>76 (3)</b>          |

n (%) are presented.

**Supplementary Table 2.** Overall coverage of MDA in intervention clusters, n (% of present) population)

| MDA Cluster | Present <sup>a</sup> | Eligible    | At least 1 course | Received 3 courses | Received 2 courses only <sup>b</sup> | Single course only <sup>c</sup> | Partial course only | Refused   | <1y old   | Pregnant 1st trimester | Ine ot |
|-------------|----------------------|-------------|-------------------|--------------------|--------------------------------------|---------------------------------|---------------------|-----------|-----------|------------------------|--------|
| 1           | 215                  | 204 (94.9)  | 196 (91.2)        | 117 (54.4)         | 27 (12.6)                            | 52 (24.2)                       | 2 (0.9)             | 6 (2.8)   | 8 (3.7)   | 2 (0.9)                | 1      |
| 2           | 450                  | 432 (96)    | 337 (74.9)        | 189 (42)           | 70 (15.6)                            | 78 (17.3)                       | 1 (0.2)             | 94 (20.9) | 17 (3.8)  | 0 (0)                  | 1      |
| 3           | 222                  | 216 (97.3)  | 203 (91.4)        | 173 (77.9)         | 19 (8.6)                             | 11 (5)                          | 0 (0)               | 13 (5.9)  | 5 (2.3)   | 0 (0)                  | 1      |
| 4           | 266                  | 256 (96.2)  | 251 (94.4)        | 188 (70.7)         | 35 (13.2)                            | 28 (10.5)                       | 0 (0)               | 5 (1.9)   | 8 (3)     | 1 (0.4)                | 1      |
| 5           | 1045                 | 1014 (97)   | 985 (94.3)        | 699 (66.9)         | 166 (15.9)                           | 120 (11.5)                      | 1 (0.1)             | 28 (2.7)  | 30 (2.9)  | 1 (0.1)                | 0      |
| 6           | 574                  | 548 (95.5)  | 515 (89.7)        | 308 (53.7)         | 114 (19.9)                           | 93 (16.2)                       | 5 (0.9)             | 28 (4.9)  | 9 (1.6)   | 4 (0.7)                | 13     |
| 7           | 1052                 | 1013 (96.3) | 955 (90.8)        | 731 (69.5)         | 132 (12.5)                           | 92 (8.7)                        | 3 (0.3)             | 55 (5.2)  | 38 (3.6)  | 1 (0.1)                | 0      |
| 8           | 794                  | 782 (98.5)  | 714 (89.9)        | 492 (62)           | 154 (19.4)                           | 68 (8.6)                        | 5 (0.6)             | 63 (7.9)  | 9 (1.1)   | 2 (0.3)                | 1      |
| All MDA     | 4618                 | 4465 (96.7) | 4156 (90.0)       | 2897 (62.7)        | 717 (15.5)                           | 542 (11.7)                      | 17 (0.4)            | 292 (6.3) | 124 (2.7) | 11 (0.2)               | 18     |

<sup>a</sup> Physically present in the target cluster on at least one day of MDA distribution

<sup>b</sup> Completed at least 2 but not 3 MDA treatment courses

<sup>c</sup> Completed at least 1 but not 2 or more MDA treatment courses

<sup>d</sup> Including previous adverse reaction to medication and concurrent illness

**Supplementary Table 3.** MDA coverage by round and cluster

|    | MDA Cluster | Present in Round | Eligible for MDA | Completed MDA | Refused all medication in round | Ineligible for medication | Under 1 year old | Pregnant 1st trimester | Other ineligible | Partial course in round | Took 1 or 2 doses then refused | Took 1 or 2 doses then deemed ineligible | Took 1 or 2 doses then refused |
|----|-------------|------------------|------------------|---------------|---------------------------------|---------------------------|------------------|------------------------|------------------|-------------------------|--------------------------------|------------------------------------------|--------------------------------|
| M0 | 1           | 180              | 166 (92.2)       | 149 (82.8)    | 13 (7.2)                        | 14 (7.8)                  | 9 (5)            | 4 (2.2)                | 1 (0.6)          | 4 (2.2)                 | 3 (1.7)                        | 1 (0.6)                                  |                                |
|    | 2           | 380              | 358 (94.2)       | 255 (67.1)    | 102 (26.8)                      | 22 (5.8)                  | 17 (4.5)         | 2 (0.5)                | 3 (0.8)          | 1 (0.3)                 | 1 (0.3)                        | 0 (0)                                    |                                |
|    | 3           | 197              | 190 (96.4)       | 174 (88.3)    | 16 (8.1)                        | 7 (3.6)                   | 5 (2.5)          | 2 (1)                  | 0 (0)            | 0 (0)                   | 0 (0)                          | 0 (0)                                    |                                |
|    | 4           | 230              | 220 (95.7)       | 214 (93)      | 6 (2.6)                         | 10 (4.3)                  | 8 (3.5)          | 1 (0.4)                | 1 (0.4)          | 0 (0)                   | 0 (0)                          | 0 (0)                                    |                                |
|    | 5           | 844              | 807 (95.6)       | 764 (90.5)    | 39 (4.6)                        | 37 (4.4)                  | 30 (3.6)         | 6 (0.7)                | 1 (0.1)          | 4 (0.5)                 | 2 (0.2)                        | 0 (0)                                    |                                |
|    | 6           | 475              | 442 (93.1)       | 402 (84.6)    | 33 (6.9)                        | 34 (7.2)                  | 12 (2.5)         | 5 (1.1)                | 16 (3.4)         | 6 (1.3)                 | 1 (0.2)                        | 1 (0.2)                                  |                                |
|    | 7           | 966              | 923 (95.5)       | 834 (86.3)    | 84 (8.7)                        | 42 (4.3)                  | 39 (4)           | 3 (0.3)                | 1 (0.1)          | 6 (0.6)                 | 3 (0.3)                        | 0 (0)                                    |                                |
|    | 8           | 728              | 715 (98.2)       | 640 (87.9)    | 68 (9.3)                        | 13 (1.8)                  | 9 (1.2)          | 2 (0.3)                | 2 (0.3)          | 7 (1)                   | 3 (0.4)                        | 0 (0)                                    |                                |
|    | Total M0    | 4000             | 3821 (95.5)      | 3432 (85.8)   | 361 (9)                         | 179 (4.5)                 | 129 (3.2)        | 25 (0.6)               | 25 (0.6)         | 28 (0.7)                | 13 (0.3)                       | 2 (0.1)                                  |                                |
| M1 | 1           | 176              | 163 (92.6)       | 142 (80.7)    | 20 (11.4)                       | 13 (7.4)                  | 9 (5.1)          | 4 (2.3)                | 0 (0)            | 1 (0.6)                 | 0 (0)                          | 0 (0)                                    |                                |
|    | 2           | 376              | 356 (94.7)       | 257 (68.4)    | 99 (26.3)                       | 20 (5.3)                  | 17 (4.5)         | 2 (0.5)                | 1 (0.3)          | 0 (0)                   | 0 (0)                          | 0 (0)                                    |                                |
|    | 3           | 213              | 208 (97.7)       | 194 (91.1)    | 14 (6.6)                        | 5 (2.3)                   | 5 (2.3)          | 0 (0)                  | 0 (0)            | 0 (0)                   | 0 (0)                          | 0 (0)                                    |                                |
|    | 4           | 233              | 222 (95.3)       | 215 (92.3)    | 7 (3)                           | 11 (4.7)                  | 8 (3.4)          | 2 (0.9)                | 1 (0.4)          | 0 (0)                   | 0 (0)                          | 0 (0)                                    |                                |
|    | 5           | 935              | 902 (96.5)       | 864 (92.4)    | 38 (4.1)                        | 33 (3.5)                  | 30 (3.2)         | 3 (0.3)                | 0 (0)            | 0 (0)                   | 0 (0)                          | 0 (0)                                    |                                |
|    | 6           | 498              | 475 (95.4)       | 421 (84.5)    | 47 (9.4)                        | 23 (4.6)                  | 9 (1.8)          | 5 (1)                  | 9 (1.8)          | 7 (1.4)                 | 0 (0)                          | 3 (0.6)                                  |                                |
|    | 7           | 982              | 937 (95.4)       | 856 (87.2)    | 74 (7.5)                        | 45 (4.6)                  | 39 (4)           | 6 (0.6)                | 0 (0)            | 7 (0.7)                 | 0 (0)                          | 0 (0)                                    |                                |
|    | 8           | 691              | 679 (98.3)       | 593 (85.8)    | 82 (11.9)                       | 12 (1.7)                  | 9 (1.3)          | 2 (0.3)                | 1 (0.1)          | 4 (0.6)                 | 0 (0)                          | 0 (0)                                    |                                |
|    | Total M1    | 4104             | 3942 (96.1)      | 3542 (86.3)   | 381 (9.3)                       | 162 (3.9)                 | 126 (3.1)        | 24 (0.6)               | 12 (0.3)         | 19 (0.5)                | 0 (0)                          | 3 (0.1)                                  |                                |
| M2 | 1           | 192              | 181 (94.3)       | 166 (86.5)    | 14 (7.3)                        | 11 (5.7)                  | 8 (4.2)          | 3 (1.6)                | 0 (0)            | 1 (0.5)                 | 0 (0)                          | 0 (0)                                    |                                |
|    | 2           | 392              | 374 (95.4)       | 273 (69.6)    | 100 (25.5)                      | 18 (4.6)                  | 17 (4.3)         | 1 (0.3)                | 0 (0)            | 1 (0.3)                 | 0 (0)                          | 0 (0)                                    |                                |

|          |      |             |             |           |           |          |          |          |         |         |       |
|----------|------|-------------|-------------|-----------|-----------|----------|----------|----------|---------|---------|-------|
| 3        | 213  | 208 (97.7)  | 200 (93.9)  | 8 (3.8)   | 5 (2.3)   | 5 (2.3)  | 0 (0)    | 0 (0)    | 0 (0)   | 0 (0)   | 0 (0) |
| 4        | 240  | 227 (94.6)  | 219 (91.3)  | 7 (2.9)   | 13 (5.4)  | 8 (3.3)  | 3 (1.3)  | 2 (0.8)  | 1 (0.4) | 1 (0.4) | 0 (0) |
| 5        | 982  | 950 (96.7)  | 921 (93.8)  | 29 (3)    | 32 (3.3)  | 30 (3.1) | 2 (0.2)  | 0 (0)    | 0 (0)   | 0 (0)   | 0 (0) |
| 6        | 498  | 476 (95.6)  | 422 (84.7)  | 53 (10.6) | 22 (4.4)  | 9 (1.8)  | 5 (1)    | 8 (1.6)  | 1 (0.2) | 0 (0)   | 0 (0) |
| 7        | 972  | 928 (95.5)  | 859 (88.4)  | 67 (6.9)  | 44 (4.5)  | 38 (3.9) | 6 (0.6)  | 0 (0)    | 2 (0.2) | 0 (0)   | 0 (0) |
| 8        | 687  | 672 (97.8)  | 587 (85.4)  | 82 (11.9) | 15 (2.2)  | 9 (1.3)  | 2 (0.3)  | 4 (0.6)  | 3 (0.4) | 0 (0)   | 0 (0) |
| Total M2 | 4176 | 4016 (96.2) | 3647 (87.3) | 360 (8.6) | 160 (3.8) | 124 (3)  | 22 (0.5) | 14 (0.3) | 9 (0.2) | 1 (0)   | 0 (0) |

**Supplementary Table 4.** Odds ratios (95% Confidence Intervals) from exploratory analyses of factors associated with uPCR detected *P. falciparum* infection in intervention clusters after MDA.

| Variable                                                                         | Month 3         | Month 5        | Month 10      | Month 15       | Month 21       | Month 27      | Month 33      |
|----------------------------------------------------------------------------------|-----------------|----------------|---------------|----------------|----------------|---------------|---------------|
| Male                                                                             | 5.5 (1.2,25.6)  | 3.2 (0.9,11.8) | 2.0 (1.0,4.2) | 3.9 (1.7,9.3)  | 4.1 (1.1,15.1) | 1.6 (0.8,3.4) | 2.8 (1.2,6.5) |
| Age (per 10 years)                                                               | 1.3 (0.7,2.1)   | 0.9 (0.6,1.5)  | 0.9 (0.7,1.2) | 1.0 (0.8,1.4)  | 0.9 (0.6,1.4)  | 0.8 (0.6,1.1) | 1.0 (0.8,1.4) |
| Reported recent <sup>a</sup> overnight forest stay?                              | 3.2 (0.9,11.2)  | 2.8 (0.9,8.7)  | 2.1 (1.0,4.3) | 1.9 (0.9, 3.9) | 1.8 (0.6,5.4)  | 2.2 (1.0,4.9) | 2.1 (1.0,4.4) |
| Reported recent <sup>a</sup> overnight stay outside <sup>b</sup> of the village? | 0.5 (0.1,2.4)   | 2.3 (0.7,7.3)  | 1.6 (0.8,3.4) | 1.2 (0.6,2.7)  | 0.2 (0.03,1.9) | 1.0 (0.4,2.3) | 1.2 (0.5,2.7) |
| Reported frequency of bednet use                                                 |                 |                |               |                |                |               |               |
| Never                                                                            | Reference       | Reference      | Reference     | Reference      | No events      | Reference     | Reference     |
| Sometimes <sup>c</sup>                                                           | 1.8 (0.2,16.6)  | 0.3 (0.04,1.8) | 0.8 (0.2,3.0) | 1.1 (0.3,3.9)  | Reference      | 0.9 (0.1,5.9) | 0.5 (0.2,1.9) |
| Usually <sup>d</sup>                                                             | 1.3 (0.1, 11.2) | 0.2 (0.05,0.9) | 0.4 (0.1,1.1) | 0.8 (0.2,2.7)  | 0.2 (0.1,0.5)  | 0.9 (0.2,4.2) | 0.3 (0.1,0.9) |
| Did not receive MDA?                                                             | 19.0 (5.6,64.7) | 5.0 (1.6,16.0) | 2.1 (1.0,4.5) | 1.4 (0.7,3.0)  | 3.3 (1.1,9.7)  | 2.0 (0.9,4.3) | 2.6 (1.3,5.4) |

Odds Ratios (95% Confidence Intervals) are presented from univariable multilevel mixed-effects model with cluster as a random effect.

<sup>a</sup> Question wording changed from survey to survey so the definition of “recent” varies across surveys (see Supplementary Table 5).

<sup>b</sup> Question wording changed from survey to survey so the definition of “outside” varies across (see Supplementary Table 5).

<sup>c</sup> 1-3 nights per week. Question wording and order changed from survey to survey (see Supplementary Table 6).

<sup>d</sup> Question wording and order changed from survey to survey so the definition of “usually” varies across surveys from (see Supplementary [Table 6](#)).

**Supplementary Table 5.** Wording of questions for uPCR surveys included as an exposure in the model reported in Table 1 and Table 2

| Month | Reported recent overnight forest stay                                                                        | Reported recent overnight stay outside of the village                                                                               |
|-------|--------------------------------------------------------------------------------------------------------------|-------------------------------------------------------------------------------------------------------------------------------------|
| -2    | Did you stay overnight in the forest in last 3 months?                                                       | Did you travel outside of village overnight in the last 3 months?                                                                   |
| 3     | Did you stay overnight in the forest during last 5 months (since we took blood from you)?                    | Did you travel and stay overnight outside of village (but not the same forest under Q4) during the last 5 months?                   |
| 5     | Did you stay overnight in the forest since January (or June) 2015 (since we took blood from you)?            | Did you travel and stay overnight outside of village (but not the same forest under Q4) since January (or June) 2015 ?              |
| 10    | Did you stay overnight in the forest since May (beginning of rainy season) 2015?                             | Did you travel and stay overnight outside of village (but not the same forest under Q4) since May (Beginning of rainy season) 2015? |
| 15    | Did you stay overnight in the forest since May (beginning of rainy season) 2015, or your previous uPCR test? | Did you travel and stay overnight outside of village (but not the same forest under Q5) since May 2015 or your previous uPCR test?  |
| 21    | Did you stay overnight in the forest in the last 3 months?                                                   | Did you stay overnight in another village/town in last 3 months?                                                                    |
| 27    | Did you stay overnight in the forest in the last 3 months?                                                   | Did you stay overnight in another village/town in last 3 months?                                                                    |
| 33    | Did you stay overnight in the forest in the last 3 months?                                                   | Did you stay overnight in another village/town in last 3 months?                                                                    |

**Supplementary Table 6.** Wording of questions for bednet use frequency

| Month | Frequency of use                                                                                                                                                                                  | Ownership                                                                                    | Ownership asked before or after frequency asked |
|-------|---------------------------------------------------------------------------------------------------------------------------------------------------------------------------------------------------|----------------------------------------------------------------------------------------------|-------------------------------------------------|
| -2    | <b>Do you use a bed net?</b><br>Most nights <sup>a</sup><br>Some nights <sup>b</sup><br>Never use <sup>c</sup>                                                                                    |                                                                                              |                                                 |
| 3     | <b>Do you use a bed net?</b><br>Yes, use 4-7 nights per week <sup>a</sup><br>Yes, use 1-3 nights per week <sup>b</sup><br>No, never use <sup>c</sup>                                              | <b>If not using a bed net: do you /your family have a bed net?</b><br>Yes<br>No <sup>c</sup> | After                                           |
| 5     | <b>How often do you use bed nets?</b><br>Yes, use every night <sup>a</sup><br>Yes use 4-6 nights per week <sup>a</sup><br>Yes, use 1-3 nights per week <sup>b</sup><br>No, never use <sup>c</sup> | <b>Do you have a bed net?</b><br>Yes<br>No <sup>c</sup>                                      | Before                                          |
| 10    | <b>How often do you use bed nets?</b><br>Yes, use every night <sup>a</sup><br>Yes use 4-6 nights per week <sup>a</sup><br>Yes, use 1-3 nights per week <sup>b</sup><br>No, never use <sup>c</sup> | <b>Do you have a bed net?</b><br>Yes<br>No <sup>c</sup>                                      | Before                                          |
| 15    | <b>How often do you use bed nets?</b><br>Yes, use every night <sup>a</sup><br>Yes use 4-6 nights per week <sup>a</sup><br>Yes, use 1-3 nights per week <sup>b</sup><br>No, never use <sup>c</sup> | <b>Do you have a bed net?</b><br>Yes<br>No <sup>c</sup>                                      | Before                                          |
| 21    | <b>Do you use a bed net?</b><br>Yes, everyday <sup>a</sup><br>Yes, 4-6 nights per week <sup>a</sup><br>Yes, use 1-3 nights per week <sup>b</sup><br>No, never use <sup>c</sup>                    |                                                                                              |                                                 |
| 27    | <b>Do you use a bed net?</b><br>Yes, everyday <sup>a</sup><br>Yes, 4-6 nights per week <sup>a</sup><br>Yes, use 1-3 nights per week <sup>b</sup><br>No, never use <sup>c</sup>                    |                                                                                              |                                                 |
| 33    | <b>Do you use a bed net?</b><br>Yes, everyday <sup>a</sup><br>Yes, 4-6 nights per week <sup>a</sup><br>Yes, use 1-3 nights per week <sup>b</sup><br>No, never use <sup>c</sup>                    |                                                                                              |                                                 |

<sup>a</sup> Response coded to usually use

<sup>b</sup> Response coded to sometimes use

<sup>c</sup> Response coded to never use

**Supplementary Table 7. *Plasmepsin 2* copy number**

|                                                                 | Screening<br>(Month -2) |         | Month 3 |         | Month 5 |         | Month 10 |         | Month 15 |         | Month 21 |         | Month 27 |         | Month 33 |         |
|-----------------------------------------------------------------|-------------------------|---------|---------|---------|---------|---------|----------|---------|----------|---------|----------|---------|----------|---------|----------|---------|
|                                                                 | MDA                     | Control | MDA     | Control | MDA     | Control | MDA      | Control | MDA      | Control | MDA      | Control | MDA      | Control | MDA      | Control |
| <b>Multicopy<br/>plasmepsin 2</b>                               | 0/50                    | 0/41    | 0/7     | 0/27    | 0/6     | 0/10    | 0/18     | 0/14    | 0/26     | 0/14    | 0/7      | 0/9     | 0/19     | 0/14    | 0/24     | 0/13    |
| <b>Median Copy<br/>Number Variation<br/>(relative quantity)</b> | 0.98                    | 0.92    | 0.92    | 0.96    | 0.97    | 0.98    | 0.98     | 0.99    | 0.96     | 0.88    | 0.93     | 0.96    | 1.09     | 1.11    | 1.00     | 1.02    |



**Supplementary table 8.** Adverse events by MDA round and severity

| Severity | Overall, n (%) | Round 1, n (%) | Round 2, n (%) | Round 3, n (%) |
|----------|----------------|----------------|----------------|----------------|
| Mild     | 120 (79.5)     | 66 (78.6)      | 42 (87.5)      | 12 (63.2)      |
| Moderate | 25 (16.6)      | 17 (20.2)      | 5 (10.4)       | 3 (15.8)       |
| Severe   | 6 (4)          | 1 (1.2)        | 1 (2.1)        | 4 (21.1)       |
| Total    | 151            | 84             | 48             | 19             |

**Supplementary table 9.** Classification of adverse events

| Types               | Round 1   | Round 2   | Round 3  | Total      |
|---------------------|-----------|-----------|----------|------------|
| Dizziness           | 62 (73.8) | 40 (83.3) | 7 (36.8) | 109 (72.2) |
| Rash and itchiness  | 11 (13.1) | 5 (10.4)  | 4 (21.1) | 20 (13.2)  |
| Nausea              | 2 (2.4)   |           |          | 2 (1.3)    |
| Vomiting            | 7 (8.3)   |           | 1 (5.3)  | 8 (5.3)    |
| Abdominal pain      | 1 (1.2)   |           | 1 (5.3)  | 2 (1.3)    |
| Others              | 1 (1.2)   | 3 (6.3)   | 6 (31.6) | 10 (6.6)   |
| Bleeding per vagina |           |           | 2 (10.5) | 2 (1.3)    |
| Fever               | 1 (1.2)   | 1 (2.1)   | 4 (21.1) | 6 (4)      |
| Headache            |           | 1 (2.1)   |          | 1 (0.7)    |
| Hypertension        |           | 1 (2.1)   |          | 1 (0.7)    |
| Total               | 84 (100)  | 48 (100)  | 19 (100) | 151 (100)  |

**Supplementary table 10.** Adverse events categorised by relation to medication

| Relationship to drug | n (%)     |
|----------------------|-----------|
| Not                  | 12 (7.9)  |
| Unlikely             | 40 (26.5) |
| Possibly             | 81 (53.6) |
| Probably             | 18 (11.9) |
| Total                | 151       |

**Supplementary Table 11.** Serious Adverse Events

| SAE number | Age (years) | Gender | N rounds MDA completed | Date last took DP ( $\pm$ PQ) | Date of Onset | Description                                                                                                                                              | Outcome   | Trial drug relationship | Comments                                                                          |
|------------|-------------|--------|------------------------|-------------------------------|---------------|----------------------------------------------------------------------------------------------------------------------------------------------------------|-----------|-------------------------|-----------------------------------------------------------------------------------|
| SAE001     | 3           | F      | 1                      | 6-Mar-2015                    | 6-Mar-2015    | Severe dehydration secondary to diarrhoea and vomiting which started 4 h after taking study drugs. Judged to require hospitalization but parents refused | Recovered | Unknown                 | Continued study drugs without problem                                             |
| SAE002     | 56          | M      | 2                      | 5-Apr-2015                    | 6-Apr-2015    | Sudden death (collapse) while exerting himself (cutting down a tree)                                                                                     | Death     | Unlikely                | Known hypertension- on enalapril for 3 years                                      |
| SAE003     | 74          | F      | 2                      | 1-Apr-2015                    | 10-Apr-2015   | Death on 24-Apr-2015 following two weeks of abdominal pain similar to pre-existing symptoms and anorexia                                                 | Death     | Unlikely                | Weight 37.2 kg. Long history of gastritis                                         |
| SAE004     | 19          | F      | 2                      | 1-Apr-2015                    | 24-Apr-2015   | Stillbirth on 29 April 2015 after 5 days vaginal bleeding (self-reported gestation = 7 months)                                                           | Recovered | Unlikely                | Gravida 1, Parity 0. DP without PQ given<br>Did not receive 3 <sup>rd</sup> round |
| SAE005     | 33          | F      | 3                      | 4-May-2015                    | 5-May 2015    | Shock secondary to incomplete abortion requiring hospitalization for evacuation of retained products of conception and blood transfusion                 | Recovered | Possible                | G9, P6. Did not know she was pregnant.                                            |
| SAE006     | 12          | F      | 2                      | 2-Apr-2015                    | 8-Apr-2015    | Death on 9-Apr-2018 after short (<24h) illness: small haematemesis and generalised itching (no rash or jaundice).                                        | Death     | Unlikely                |                                                                                   |

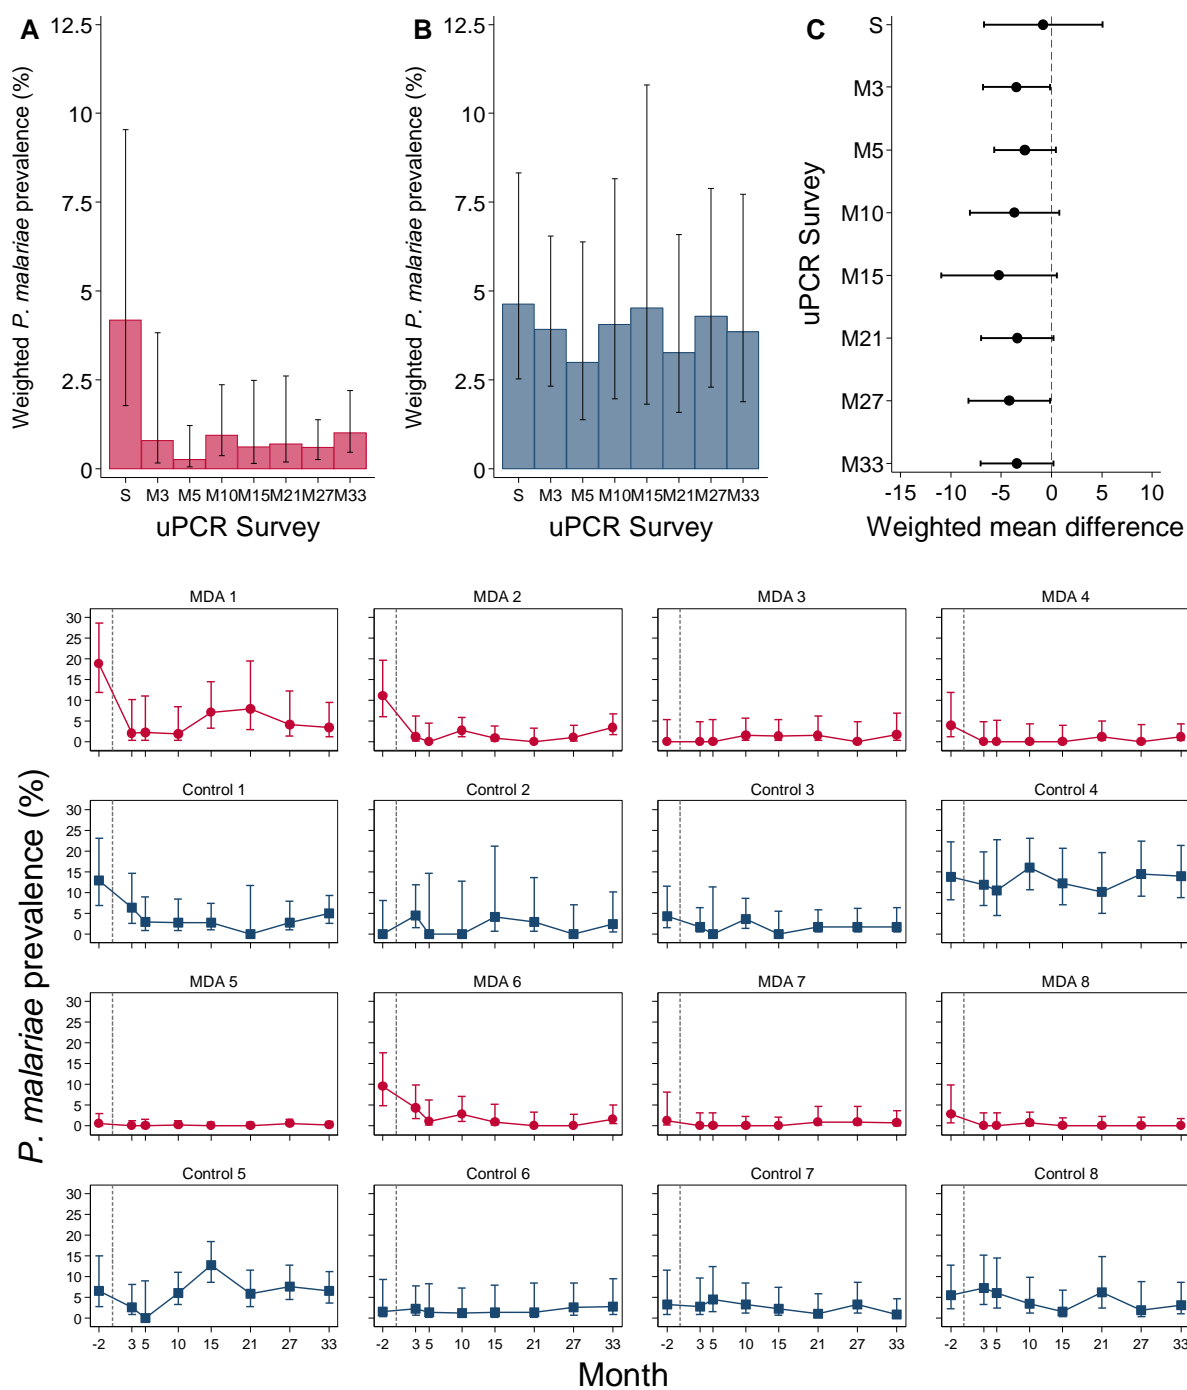

**Supplementary Figure 1. *P. malariae* prevalence (by uPCR).** Weighted mean *P. malariae* prevalence by uPCR survey timepoint in (A) intervention arm and (B) control arm. Red (intervention) and blue (control) bars denote point estimate and vertical capped lines indicate 95% confidence intervals. (C) Weighted mean difference (black dots) and 95% confidence intervals (horizontal capped lines) in *P. malariae* prevalence in intervention arm relative to control arm by uPCR survey timepoint. Dashed grey line denotes weighted mean difference of zero. (D) *P. malariae* prevalence in intervention and control clusters over time. Red circles (intervention) and blue squares (control) denote point estimates and capped vertical lines denote 95% confidence intervals. Vertical dashed grey line indicates MDA start (Month 0). S = screening survey; M = survey month.

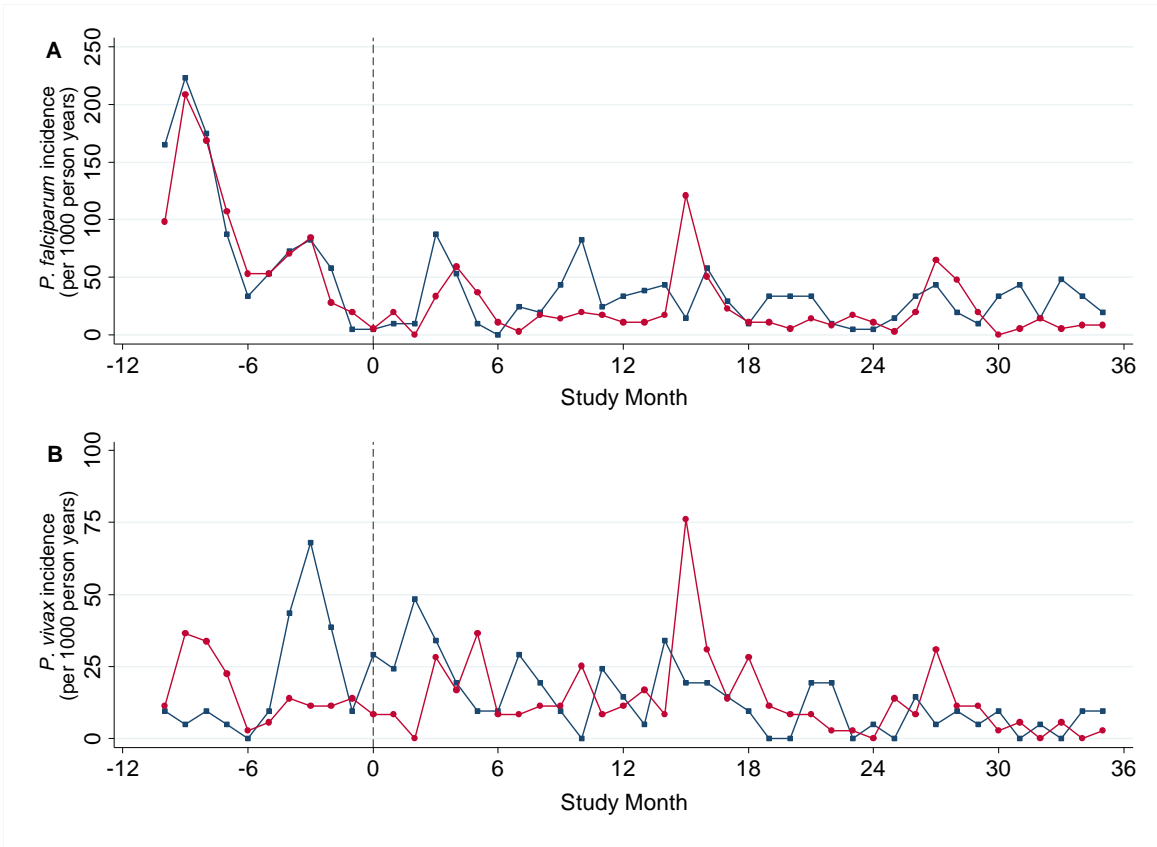

**Supplementary Figure 2. Monthly (A) *P. falciparum* and (B) *P. vivax* incidence in intervention (red) and control arm (blue) in study pairs 4-8. Study pairs 4 through 8 all had operational CHWs from study month -10.**

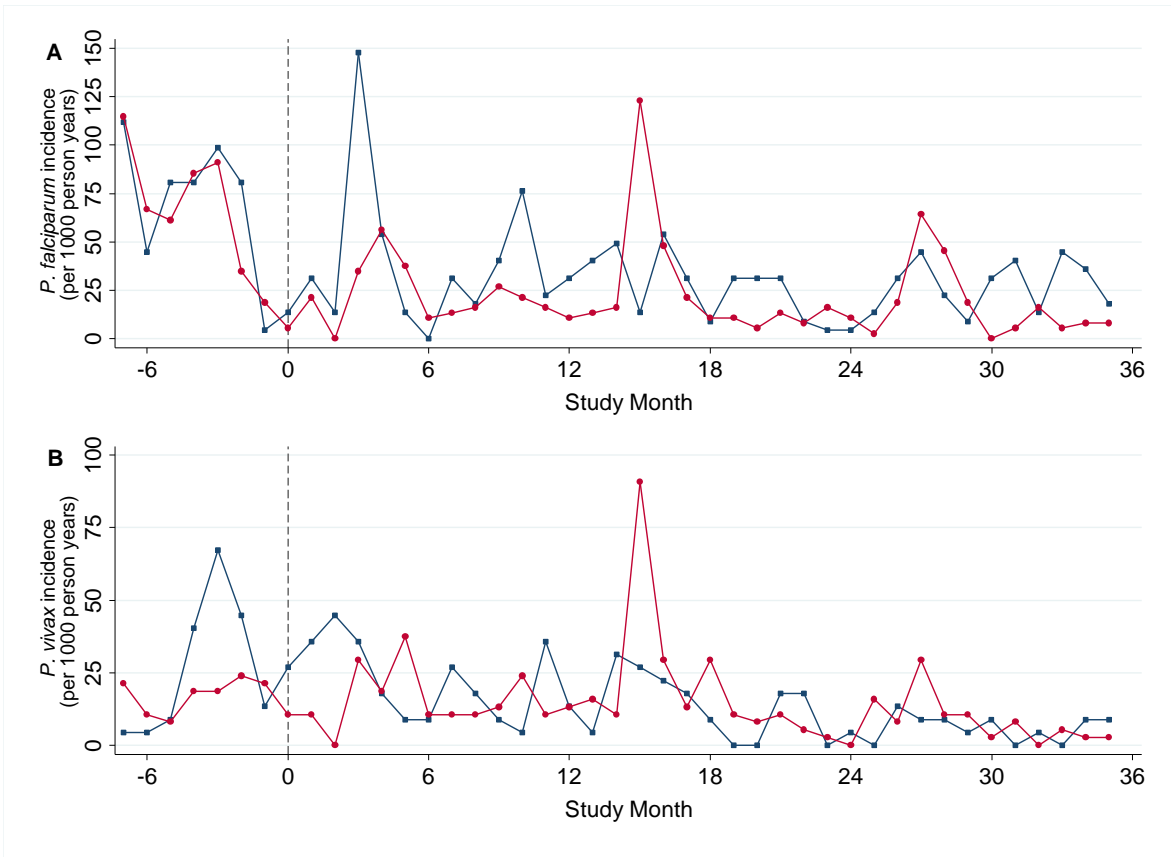

**Supplementary Figure 3. Monthly (A) *P. falciparum* and (B) *P. vivax* incidence in intervention (red) and control arm (blue) in study pairs 3-8. Study pairs 3 through 8 all had operational CHWs from study month -7.**

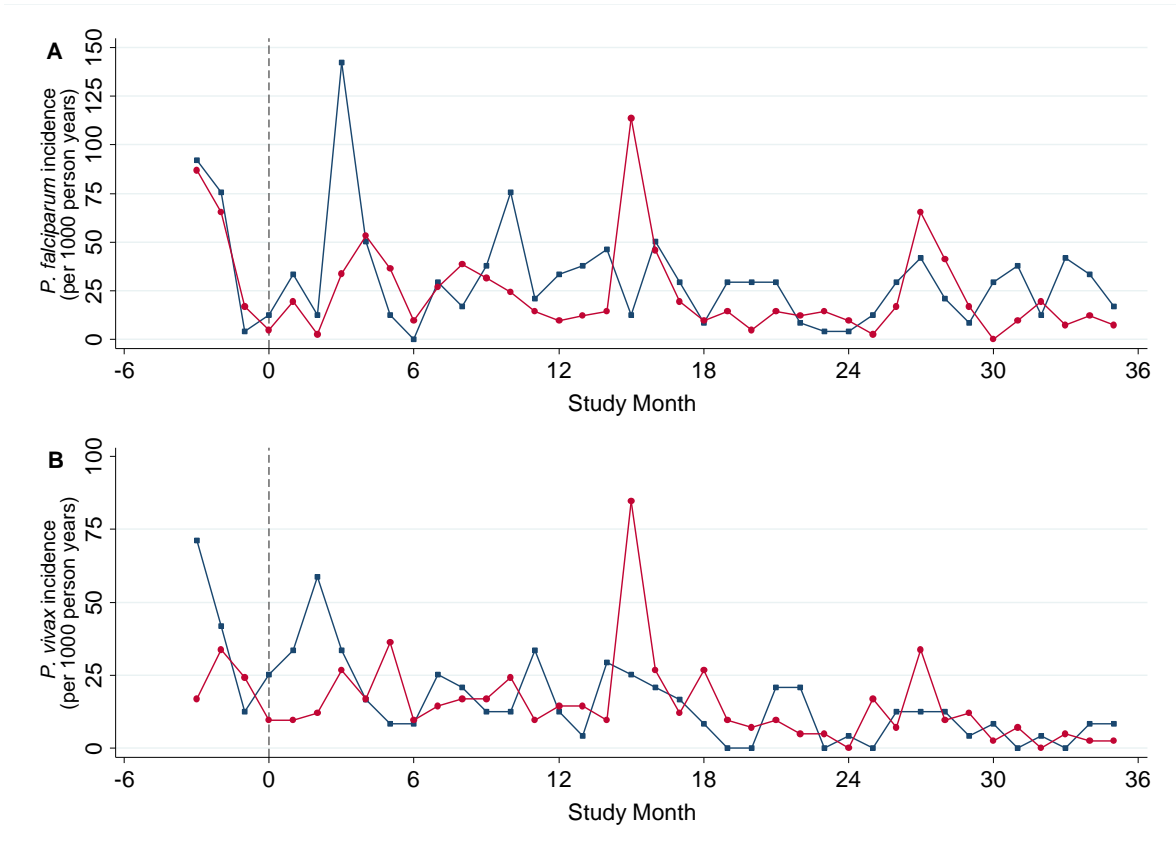

**Supplementary Figure 4. Monthly (A) *P. falciparum* and (B) *P. vivax* incidence in intervention (red) and control arm (blue) in study pairs 2-8. Study pairs 2 through 8 all had operational CHWs from study month -3.**



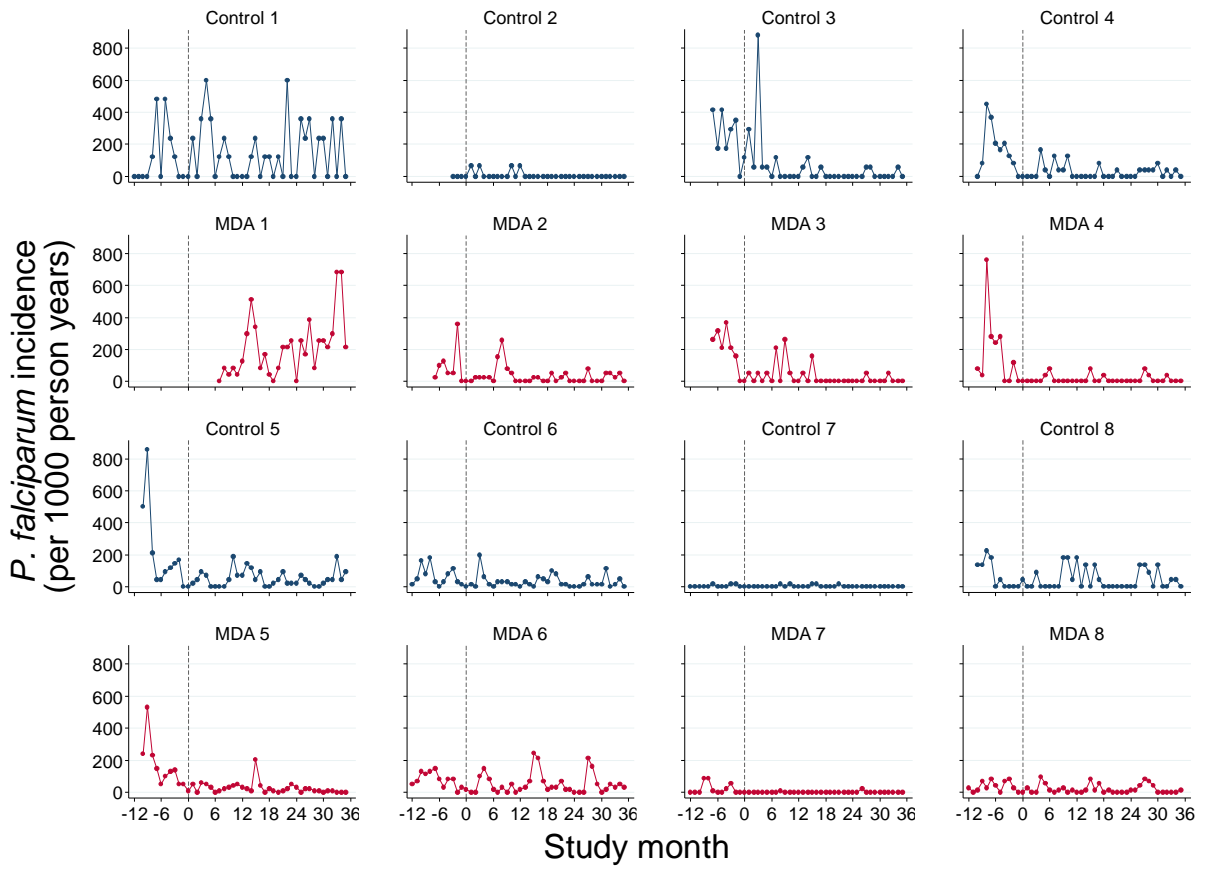

**Supplementary Figure 5. Monthly *P. falciparum* incidence (per 1000 person years) in intervention (red) and control (blue) clusters.**

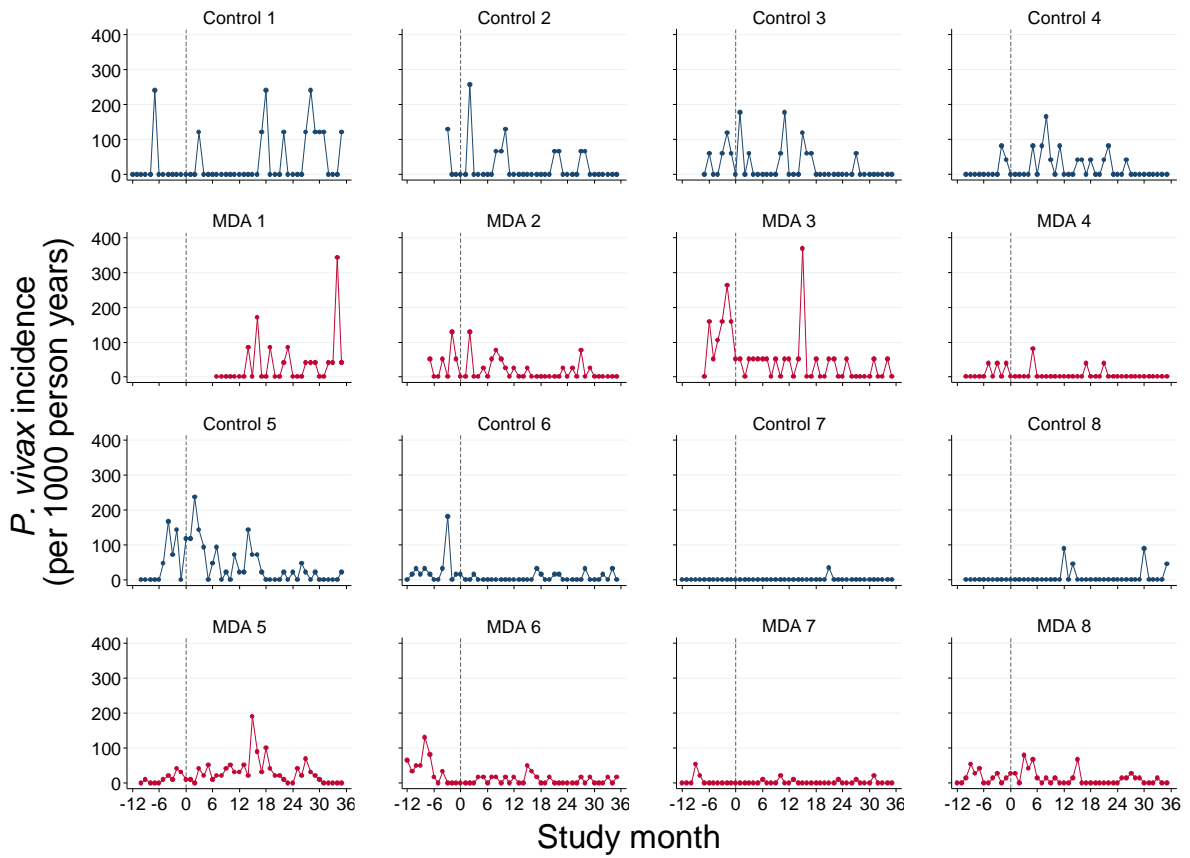

**Supplementary Figure 6. Monthly *P. vivax* incidence (per 1000 person years) in intervention (red) and control (blue) clusters.**
